# Supplementary material for: GPR176 enhances the epithelial-mesenchymal transition in gastric cancer cells by activating the PI3K/AKT/mTOR signaling pathway
Source: Research Square preprint supplement (doi:10.21203/rs.3.rs-5713551/v1), 2025-02-17
Supplement: Supplementary file 1 [file 262db6138f8a6bf37c306f20.docx]

| Primers | Sequences（5’-3’） |
| --- | --- |
| H-GPR176-F | TCTTCATAGGCTCGCTGCTC |
| H-GPR176-R | AATGAACTTAATCCCAGGCAGT |
| H-E-cad-F | TACCCTGGTGGTTCAAGCTG |
| H-E-cad-R | CAAAATCCAAGCCCGTGGTG |
| H-N-cad-F | ATGGGAAATGGAAACTTGATGGC |
| H-N-cad-R | AGCTTCTCACGGCATACACC |
| H-vementin-F | GGACCAGCTAACCAACGACA |
| H-vementin-R | AAGGTCAAGACGTGCCAGAG |
| H-snail-F | TAGAGTCTGAGATGCCCCGA |
| H-snail-R | ACAGCCATTACTCACAGTCCC |
| H-ACTB-F | AGTCATTCCAAATATGAGATGCGTT |
| H-ACTB-R | TGCTATCACCTCCCCTGTGT |
| H-PIP5K1A -F | AAGATTCCCTGCGTTCACCT |
| H-PIP5K1A -R | AGGCTTTGCGCTTAATGGGT |

**Table S2.** The Sequences of Primers used in this study.
