# Supplementary material for: GPR176 enhances the epithelial-mesenchymal transition in gastric cancer cells by activating the PI3K/AKT/mTOR signaling pathway
Source: Research Square preprint supplement (doi:10.21203/rs.3.rs-5713551/v1), 2025-02-17
Supplement: Supplementary file 2 [file 6836e6ee1f90f560fd00cfa7.docx]

**Table S4.** Cox regression analysis of GPR176 expression as survival predictor

| Variables | Univariate Cox regression analysis | |  | Multivariate Cox regression analysis | |
| --- | --- | --- | --- | --- | --- |
| RR (95% CI) | *P* value |  | RR (95% CI) | *P* value |
| *Age (years)* |  |  |  |  |  |
| ≥60 vs. <60 | 1.486(1.036 to 2.130) | 0.031 |  | 1.781 (1.214 to 2.613) | 0.003 |
| *Gender* |  |  |  |  |  |
| Male vs. Female | 1.280 (0.912 to 1.798) | 0.154 |  | 1.384 (0.959 to 1.997) | 0.083 |
| *Pathological stage* |  |  |  |  |  |
| Ⅲ/Ⅳ vs.Ⅰ/Ⅱ | 1.915 (1.362 to 2.692) | <0.001 |  | 1.218 (1.218 to 2.690) | 0.447 |
| *T stage* |  |  |  |  |  |
| T3+T4 vs. T1+T2 | 1.813 (1.215 to 2.707) | 0.004 |  | 1.234 (0.761 to 2.002) | 0.394 |
| *N staging* |  |  |  |  |  |
| Positive vs. Negative | 1.947 (1.312 to 2.888) | 0.001 |  | 1.514 (0.880 to 2.604) | 0.134 |
| *M stage* |  |  |  |  |  |
| Positive vs. Negative | 2.447 (1.408 to 4.250) | 0.001 |  | 2.291 (1.258 to 4.172) | 0.007 |
| *Histological grade* |  |  |  |  |  |
| G3 VS G1+G2 | 1.419 (1.017 to 1.980) | 0.040 |  | 1.399 (0.973 to 2.012) | 0.070 |
| *GPR176 expression* |  |  |  |  |  |
| High VS. Low | 1.371 (1.001 to 1.883) | 0.048 |  | 1.281(0.912 to 1.800) | 0.036 |

NA: not analyzed
