# Supplementary material for: GPR176 enhances the epithelial-mesenchymal transition in gastric cancer cells by activating the PI3K/AKT/mTOR signaling pathway
Source: Research Square preprint supplement (doi:10.21203/rs.3.rs-5713551/v1), 2025-02-17
Supplement: Supplementary file 3 [file a115f88b97d74a17ae88ae63.docx]

Figure S1. Lentivirus infection and verification of working efficiency. a-b, Lentivirus working efficiency verified by PCR; c-d, Lentivirus working efficiency verified by Western Blot.

Figure S2. Quantitative bar graph of protein expression levels of EMT pathway genes after GPR176 expression regulation, corresponding to Figure 4d. a. Expression levels of EMT pathway proteins in HGC-27 cells after upregulation and downregulation of GPR176 expression; b. Expression levels of EMT pathway proteins in NCI-N87 cells after upregulation and downregulation of GPR176 expression.

Figure S3. Quantitative bar graphs of protein expression levels and phosphorylation levels of EMT pathway and PI3K/AKT/mTOR pathway proteins after GPR176 and PIP5K1A expression regulation, corresponding to Figure 5c-d. a. Bar graphs of protein expression levels and phosphorylation levels in the EMT pathway and PI3K/AKT/mTOR pathway in HGC-27 cells; b. Bar graphs of protein expression levels and phosphorylation levels in the EMT pathway and PI3K/AKT/mTOR pathway in NCI-N87 cells.

Figure S4. The reprehensive blots of key molecules EMT signaling pathway and PI3K/AKT/mTOR pathway at the protein level in the specific group, as well as the expression of GPR176 and PIP5K1A.

Figure S5. Quantification of protein expression levels and phosphorylation levels of EMT pathway and PI3K/AKT/mTOR pathway proteins after GPR176 expression regulation in graft tumors, corresponding to Figure 7c. a-k. Expression levels/phosphorylation levels of corresponding proteins.
