# Supplementary material for: GPR176 enhances the epithelial-mesenchymal transition in gastric cancer cells by activating the PI3K/AKT/mTOR signaling pathway
Source: Research Square preprint supplement (doi:10.21203/rs.3.rs-5713551/v1), 2025-02-17
Supplement: Supplementary file 4 [file c4a4139d7aee68e300e933fb.docx]

| Antibody | manufacturer | catalog number | concentration |
| --- | --- | --- | --- |
| actin | Solarbio | K006153P | 1：2000 |
| E-cadherin | Proteintech | 20874-1-AP | 1：1000 |
| Vimentin | Proteintech | 10366-1-AP | 1：5000 |
| N-cadherin | Proteintech | 22018-1-AP | 1：16000 |
| GPR176 | Abcam | ab184558 | 1：2000 |
| AKT | proteintech | 10176-2-AP | 1：12000 |
| p-AKT | proteintech | 28731-1-AP | 1：6000 |
| PIP5K1A | proteintech | 15713-1-AP | 1：50000 |
| mTOR | Proteintech | 28273-1- AP | 1：10000 |
| p-mTOR | Proteintech | 80596-1-RR | 1：50000 |

**Table S3.** Antibody information and usage concentrations in this study
