# Supplementary material for: GPR176 enhances the epithelial-mesenchymal transition in gastric cancer cells by activating the PI3K/AKT/mTOR signaling pathway
Source: Research Square preprint supplement (doi:10.21203/rs.3.rs-5713551/v1), 2025-02-17
Supplement: Supplementary file 5 [file f07ac2c8e031334e0eff4d8e.docx]

**Table S1.** The functional sequence of the shRNA lentiviral vector.

|  | Sequence (5’-3’) |
| --- | --- |
| NC | Sense UUCUCCGAACGUFUCACGUTT |
| Antisense ACGUGACACGUUCGGAGAATT |
| sh-Gpr176-1 | Sense UUUAAUUCCUAAAGUUUGCAU |
| Antisense GCAAACUUUAGGAAUUAAAAG |
| sh-Gpr176-2 | Sense AAUGAUUGUGAAAGCUUUGAA |
| Antisense CAAAGCUUUCACAAUCAUUAC |
| sh-Gpr176-3 | Sense AAUGAUUGUGAAAGCUUUGAA |
| Antisense CAAAGCUUUCACAAUCAUUAC |
| sh-PIP5K1A-1 | Sense UGAAAAAAAUUCAAUAGUGGA |
| Antisense CACUAUUGAAUUUUUUUCAGA |
| sh-PIP5K1A-2 | Sense AGUAAUAAUUACUAUAGCCUG |
| Antisense GGCUAUAGUAAUUAUUACUAU |
| sh-PIP5K1A-3 | Sense AAUAGCAAGAAUUCUUUCCUU |
| Antisense GGAAAGAAUUCUUGCUAUUUU |
